# Supplementary material for: Lipid Profiles of Human Milk and Infant Formulas: A Comparative Lipidomics Study
Source: MDPI journal article supplement (doi:10.3390/foods12030600), 2023-02-01
Supplement: s1 [file s1]

**Table S1.** Detailed information about the sources of fat in IFs

| Brand | Age Rang Target (Months) | Fat Source                                                        | LC-PUFAs | OPO addition |
|-------|--------------------------|-------------------------------------------------------------------|----------|--------------|
| IF1   | 0~6                      | Raw bovine milk, sunflower oil, coconut oil, flax oil, walnut oil | DHA, ARA | yes          |
| IF2   | 0~6                      | skimmed milk, sunflower oil, soybean oil, coconut oil             | DHA, ARA | no           |

**Table S2.** The content of lipid in positive ion mode

| Adduct ion name      | Average<br>Mz | Average<br>Rt(min) | Metabolite name            | HM            | IF1           | IF2           |
|----------------------|---------------|--------------------|----------------------------|---------------|---------------|---------------|
| [M+NH4] <sup>+</sup> | 1070.98889    | 12.191             | TG 66:3 TG 18:1_24:1_24:1  | 0.0004±0.0005 | 0.0006±0.0001 | 0.0005±0.0000 |
| [M+NH4] <sup>+</sup> | 1032.88501    | 11.207             | TG 64:8 TG 24:0_20:4_20:4  | 0.0004±0.0003 | 0.0083±0.0003 | 0.0072±0.0002 |
| [M+NH4] <sup>+</sup> | 1042.96814    | 12.002             | TG 64:3 TG 18:1_22:1_24:1  | 0.0030±0.0030 | 0.0011±0.0001 | 0.0009±0.0004 |
| [M+NH4] <sup>+</sup> | 1004.85132    | 10.968             | TG 62:8 TG 22:0_20:4_20:4  | 0.0008±0.0005 | 0.0051±0.0001 | 0.0043±0.0002 |
| [M+NH4] <sup>+</sup> | 1008.88934    | 11.287             | TG 62:6 TG 24:0_18:2_20:4  | 0.0041±0.0020 | 0.0034±0.0002 | 0.0054±0.0003 |
| [M+NH4] <sup>+</sup> | 1010.90033    | 11.457             | TG 62:5 TG 24:0_18:1_20:4  | 0.0082±0.0023 | 0.0050±0.0007 | 0.0068±0.0003 |
| [M+NH4] <sup>+</sup> | 1014.9342     | 11.804             | TG 62:3 TG 26:0_18:1_18:2  | 0.0222±0.0121 | 0.0072±0.0006 | 0.0091±0.0003 |
| [M+NH4] <sup>+</sup> | 1016.94958    | 12.004             | TG 62:2 TG 26:0_18:1_18:1  | 0.0156±0.0101 | 0.0109±0.0014 | 0.0364±0.0009 |
| [M+NH4] <sup>+</sup> | 994.78705     | 9.76               | TG 62:13 TG 18:1_22:6_22:6 | 0.0017±0.0008 | 0.0017±0.0000 | 0.0106±0.0002 |
| [M+NH4] <sup>+</sup> | 1002.93921    | 11.904             | TG 61:2 TG 25:0_18:1_18:1  | 0.0042±0.0015 | 0.0055±0.0009 | 0.0232±0.0030 |
| [M+NH4] <sup>+</sup> | 984.88379     | 11.401             | TG 60:4 TG 18:1_24:1_18:2  | 0.0523±0.0220 | 0.0645±0.0004 | 0.0554±0.0002 |
| [M+NH4] <sup>+</sup> | 986.9024      | 11.603             | TG 60:3 TG 24:0_18:1_18:2  | 0.1230±0.0582 | 0.0524±0.0015 | 0.0611±0.0015 |
| [M+NH4] <sup>+</sup> | 988.91876     | 11.783             | TG 60:2 TG 24:0_18:1_18:1  | 0.1201±0.0668 | 0.0776±0.0011 | 0.5590±0.0309 |
| [M+NH4] <sup>+</sup> | 988.92389     | 11.846             | TG 60:2 TG 16:0_18:1_26:1  | 0.1201±0.0668 | 0.0776±0.0011 | 0.5590±0.0309 |
| [M+NH4] <sup>+</sup> | 966.74939     | 9.323              | TG 60:13 TG 16:1_22:6_22:6 | 0.0009±0.0002 | 0.0027±0.0004 | 0.0154±0.0006 |
| [M+NH4] <sup>+</sup> | 972.79266     | 10.112             | TG 60:10 TG 18:1_20:3_22:6 | 0.0098±0.0011 | 0.0079±0.0002 | 0.0038±0.0005 |
| [M+NH4] <sup>+</sup> | 972.88757     | 11.485             | TG 59:3 TG 23:0_18:1_18:2  | 0.0066±0.0027 | 0.0101±0.0001 | 0.0170±0.0018 |
| [M+NH4] <sup>+</sup> | 974.90082     | 11.701             | TG 59:2 TG 23:0_18:1_18:1  | 0.0156±0.0038 | 0.0167±0.0002 | 0.0703±0.0027 |
| [M+NH4] <sup>+</sup> | 976.89374     | 11.646             | TG 59:1 TG 18:0_23:0_18:1  | 0.0023±0.0019 | 0.0074±0.0065 | 0.0086±0.0007 |
| [M+NH4] <sup>+</sup> | 946.78326     | 10.074             | TG 58:9 TG 18:1_18:2_22:6  | 0.1564±0.0259 | 0.0156±0.0003 | 0.0225±0.0016 |
| [M+NH4] <sup>+</sup> | 948.79401     | 10.391             | TG 58:8 TG 18:1_18:1_22:6  | 0.1036±0.0180 | 0.0466±0.0012 | 0.0527±0.0019 |
| [M+NH4] <sup>+</sup> | 950.81219     | 10.519             | TG 58:7 TG 18:1_18:2_22:4  | 0.0871±0.0174 | 0.0060±0.0056 | 0.0158±0.0012 |

|                      |           |        |                            |               |               |               |
|----------------------|-----------|--------|----------------------------|---------------|---------------|---------------|
| [M+NH4] <sup>+</sup> | 950.81403 | 10.132 | TG 58:7 TG 18:1_18:1_22:5  | 0.0086±0.0035 | 0.0014±0.0001 | 0.0033±0.0001 |
| [M+NH4] <sup>+</sup> | 952.83337 | 10.705 | TG 58:6 TG 18:1_18:1_22:4  | 0.0559±0.0054 | 0.0025±0.0001 | 0.0034±0.0002 |
| [M+NH4] <sup>+</sup> | 956.85437 | 11.166 | TG 58:4 TG 18:1_22:1_18:2  | 0.0893±0.0325 | 0.1106±0.0054 | 0.0899±0.0014 |
| [M+NH4] <sup>+</sup> | 958.87567 | 11.367 | TG 58:3 TG 22:0_18:1_18:2  | 0.2365±0.0963 | 0.1278±0.0036 | 0.1855±0.0006 |
| [M+NH4] <sup>+</sup> | 960.888   | 11.591 | TG 58:2 TG 16:0_18:1_24:1  | 0.3937±0.1779 | 0.2227±0.0011 | 1.3702±0.0336 |
| [M+NH4] <sup>+</sup> | 940.73474 | 9.261  | TG 58:12 TG 14:0_22:6_22:6 | 0.0008±0.0009 | 0.0030±0.0001 | 0.0947±0.0040 |
| [M+NH4] <sup>+</sup> | 944.76422 | 9.756  | TG 58:10 TG 18:2_18:2_22:6 | 0.0733±0.0070 | 0.0225±0.0002 | 0.0334±0.0026 |
| [M+NH4] <sup>+</sup> | 962.90796 | 11.814 | TG 58:1 TG 16:0_24:0_18:1  | 0.2340±0.1748 | 0.1201±0.0062 | 0.1148±0.0003 |
| [M+NH4] <sup>+</sup> | 964.91956 | 12.021 | TG 58:0 TG 16:0_18:0_24:0  | 0.0146±0.0112 | 0.0089±0.0001 | 0.0079±0.0111 |
| [M+NH4] <sup>+</sup> | 946.87213 | 11.478 | TG 57:2 TG 21:0_18:1_18:1  | 0.0260±0.0043 | 0.0152±0.0008 | 0.0305±0.0002 |
| [M+NH4] <sup>+</sup> | 920.76648 | 9.883  | TG 56:8 TG 18:2_18:2_20:4  | 0.1067±0.0948 | 0.0018±0.0002 | 0.0097±0.0002 |
| [M+NH4] <sup>+</sup> | 920.7688  | 10.062 | TG 56:8 TG 16:0_18:2_22:6  | 0.1377±0.0642 | 0.0316±0.0007 | 0.0682±0.0029 |
| [M+NH4] <sup>+</sup> | 922.78931 | 10.174 | TG 56:7 TG 18:1_18:2_20:4  | 0.2171±0.0525 | 0.0183±0.0009 | 0.0311±0.0007 |
| [M+NH4] <sup>+</sup> | 922.78314 | 10.36  | TG 56:7 TG 16:0_18:1_22:6  | 0.1019±0.0210 | 0.0000±0.0000 | 0.0150±0.0034 |
| [M+NH4] <sup>+</sup> | 928.82672 | 10.929 | TG 56:4 TG 18:1_20:1_18:2  | 0.1606±0.0226 | 0.0295±0.0026 | 0.0358±0.0009 |
| [M+NH4] <sup>+</sup> | 930.84161 | 11.128 | TG 56:3 TG 18:1_18:1_20:1  | 0.2926±0.1029 | 0.0974±0.0060 | 0.2710±0.0107 |
| [M+NH4] <sup>+</sup> | 932.85724 | 11.362 | TG 56:2 TG 16:0_18:1_22:1  | 0.4611±0.1610 | 0.2868±0.0017 | 0.5539±0.0132 |
| [M+NH4] <sup>+</sup> | 934.86829 | 11.312 | TG 56:1 TG 18:0_20:0_18:1  | 0.0554±0.0181 | 0.0322±0.0035 | 0.0742±0.0133 |
| [M+NH4] <sup>+</sup> | 936.8847  | 11.846 | TG 56:0 TG 16:0_18:0_22:0  | 0.0291±0.0205 | 0.0236±0.0006 | 0.0099±0.0112 |
| [M+NH4] <sup>+</sup> | 916.82739 | 10.994 | TG 55:3 TG 18:1_18:1_19:1  | 0.0229±0.0104 | 0.0051±0.0004 | 0.0188±0.0009 |
| [M+NH4] <sup>+</sup> | 920.85199 | 11.469 | TG 55:1 TG 16:0_21:0_18:1  | 0.0290±0.0104 | 0.0225±0.0000 | 0.0079±0.0018 |
| [M+NH4] <sup>+</sup> | 890.71875 | 9.077  | TG 54:9 TG 18:3_18:3_18:3  | 0.0024±0.0042 | 0.7157±0.0143 | 0.0345±0.0023 |
| [M+NH4] <sup>+</sup> | 892.73346 | 9.376  | TG 54:8 TG 18:2_18:3_18:3  | 0.0307±0.0126 | 0.6350±0.0179 | 0.4132±0.0156 |
| [M+NH4] <sup>+</sup> | 894.75262 | 11.412 | TG 54:7 TG 18:2_18:2_18:3  | 0.0003±0.0001 | 0.0012±0.0001 | 0.0028±0.0005 |
| [M+NH4] <sup>+</sup> | 896.76202 | 11.22  | TG 54:6 TG 18:2_18:2_18:2  | 0.0017±0.0003 | 0.0161±0.0022 | 0.0215±0.0036 |
| [M+NH4] <sup>+</sup> | 896.76343 | 10.025 | TG 54:6 TG 18:1_18:2_18:3  | 1.8150±0.7105 | 4.1889±0.2828 | 4.5356±0.1524 |

|                      |           |        |                            |               |               |               |
|----------------------|-----------|--------|----------------------------|---------------|---------------|---------------|
| [M+NH4] <sup>+</sup> | 898.7749  | 9.963  | TG 54:5 TG 18:1_18:2_18:2  | 0.2194±0.0745 | 0.4417±0.0669 | 0.5573±0.0516 |
| [M+NH4] <sup>+</sup> | 900.79388 | 10.612 | TG 54:4 TG 18:1_18:1_18:2  | 2.5596±0.7349 | 1.9793±0.0594 | 3.2902±0.1497 |
| [M+NH4] <sup>+</sup> | 902.81189 | 10.874 | TG 54:3 TG 18:1_18:1_18:1  | 1.8509±0.4736 | 1.0006±0.0185 | 4.0517±0.8521 |
| [M+NH4] <sup>+</sup> | 902.79681 | 10.616 | TG 54:3 TG 18:0_18:1_18:2  | 0.2317±0.0909 | 0.1424±0.0102 | 0.2404±0.0351 |
| [M+NH4] <sup>+</sup> | 904.82849 | 11.112 | TG 54:2 TG 18:0_18:1_18:1  | 1.4544±0.3674 | 1.2422±0.0510 | 2.7414±0.1118 |
| [M+NH4] <sup>+</sup> | 888.70465 | 9.186  | TG 54:10 TG 12:0_20:4_22:6 | 0.0026±0.0007 | 0.0026±0.0001 | 0.0018±0.0002 |
| [M+NH4] <sup>+</sup> | 906.83887 | 11.362 | TG 54:1 TG 16:0_20:0_18:1  | 0.6088±0.2006 | 0.6161±0.0025 | 0.2731±0.0148 |
| [M+NH4] <sup>+</sup> | 908.85199 | 11.593 | TG 54:0 TG 16:0_18:0_20:0  | 0.0569±0.0321 | 0.0649±0.0017 | 0.0007±0.0007 |
| [M+NH4] <sup>+</sup> | 884.76935 | 10.133 | TG 53:5 TG 17:1_18:2_18:2  | 0.0357±0.0202 | 0.0120±0.0007 | 0.0275±0.0001 |
| [M+NH4] <sup>+</sup> | 886.78345 | 10.421 | TG 53:4 TG 17:1_18:1_18:2  | 0.0973±0.0627 | 0.0263±0.0012 | 0.0472±0.0017 |
| [M+NH4] <sup>+</sup> | 888.79114 | 10.653 | TG 53:3 TG 17:1_18:1_18:1  | 0.1417±0.1072 | 0.0321±0.0013 | 0.0484±0.0003 |
| [M+NH4] <sup>+</sup> | 888.7962  | 10.759 | TG 53:3 TG 17:0_18:1_18:2  | 0.1418±0.1073 | 0.0327±0.0013 | 0.0490±0.0003 |
| [M+NH4] <sup>+</sup> | 890.81073 | 10.971 | TG 53:2 TG 17:0_18:1_18:1  | 0.1487±0.1240 | 0.0407±0.0016 | 0.0241±0.0039 |
| [M+NH4] <sup>+</sup> | 894.84723 | 11.491 | TG 53:0 TG 17:0_18:0_18:0  | 0.0113±0.0088 | 0.0190±0.0004 | 0.0026±0.0004 |
| [M+NH4] <sup>+</sup> | 864.70587 | 9.311  | TG 52:8 TG 12:0_18:2_22:6  | 0.0695±0.0177 | 0.0024±0.0011 | 0.0024±0.0004 |
| [M+NH4] <sup>+</sup> | 866.72211 | 9.429  | TG 52:7 TG 12:0_18:1_22:6  | 0.0384±0.0030 | 0.0098±0.0073 | 0.0294±0.0005 |
| [M+NH4] <sup>+</sup> | 868.73615 | 9.602  | TG 52:6 TG 16:0_18:3_18:3  | 0.3049±0.0167 | 0.3192±0.0032 | 0.1100±0.0031 |
| [M+NH4] <sup>+</sup> | 870.75006 | 10.033 | TG 52:5 TG 16:0_18:2_18:3  | 1.2011±0.1584 | 0.2996±0.0171 | 0.6189±0.0249 |
| [M+NH4] <sup>+</sup> | 872.76819 | 10.298 | TG 52:4 TG 16:0_18:2_18:2  | 3.1944±0.6917 | 2.2727±0.0749 | 2.3932±0.0857 |
| [M+NH4] <sup>+</sup> | 874.78394 | 10.574 | TG 52:3 TG 16:0_18:1_18:2  | 4.7941±0.8689 | 2.5761±0.0007 | 1.7841±0.1245 |
| [M+NH4] <sup>+</sup> | 876.79785 | 10.856 | TG 52:2 TG 16:0_18:1_18:1  | 5.4587±0.8518 | 2.5908±1.0071 | 0.9430±0.0202 |
| [M+NH4] <sup>+</sup> | 878.8103  | 11.106 | TG 52:1 TG 16:0_18:0_18:1  | 3.1242±0.9515 | 1.7214±0.2313 | 0.3442±0.0052 |
| [M+NH4] <sup>+</sup> | 880.82269 | 11.223 | TG 52:0 TG 16:0_18:0_18:0  | 0.2434±0.0803 | 0.2709±0.0025 | 0.0415±0.0032 |
| [M+NH4] <sup>+</sup> | 854.71497 | 9.527  | TG 51:6 TG 15:1_18:2_18:3  | 0.0014±0.0003 | 0.0032±0.0000 | 0.0081±0.0004 |
| [M+NH4] <sup>+</sup> | 860.76184 | 10.432 | TG 51:3 TG 15:0_18:1_18:2  | 0.1280±0.0850 | 0.0288±0.0003 | 0.0192±0.0007 |
| [M+NH4] <sup>+</sup> | 862.78461 | 10.711 | TG 51:2 TG 16:0_17:1_18:1  | 0.1665±0.1399 | 0.0600±0.0015 | 0.0237±0.0007 |

|                      |           |        |                           |               |               |               |
|----------------------|-----------|--------|---------------------------|---------------|---------------|---------------|
| [M+NH4] <sup>+</sup> | 864.79462 | 10.985 | TG 51:1 TG 16:0_17:0_18:1 | 0.1333±0.1262 | 0.0589±0.0030 | 0.0061±0.0001 |
| [M+NH4] <sup>+</sup> | 836.66974 | 8.883  | TG 50:8 TG 10:0_18:2_22:6 | 0.0553±0.0132 | 0.0003±0.0002 | 0.0008±0.0005 |
| [M+NH4] <sup>+</sup> | 838.68903 | 9.24   | TG 50:7 TG 10:0_18:1_22:6 | 0.1306±0.0423 | 0.0017±0.0006 | 0.0288±0.0001 |
| [M+NH4] <sup>+</sup> | 840.70416 | 9.629  | TG 50:6 TG 14:0_14:0_22:6 | 0.1153±0.0340 | 0.0062±0.0087 | 0.1253±0.0055 |
| [M+NH4] <sup>+</sup> | 840.70673 | 9.39   | TG 50:6 TG 12:0_18:2_20:4 | 0.1621±0.0222 | 0.0123±0.0000 | 0.1253±0.0055 |
| [M+NH4] <sup>+</sup> | 842.72113 | 9.679  | TG 50:5 TG 14:0_18:2_18:3 | 0.5753±0.0986 | 0.0323±0.0008 | 0.0359±0.0013 |
| [M+NH4] <sup>+</sup> | 844.7345  | 9.84   | TG 50:4 TG 14:0_18:2_18:2 | 0.0689±0.0290 | 0.0623±0.0001 | 0.0517±0.0037 |
| [M+NH4] <sup>+</sup> | 846.7511  | 10.242 | TG 50:3 TG 14:0_18:1_18:2 | 1.6192±0.0541 | 0.3114±0.0043 | 0.1126±0.0034 |
| [M+NH4] <sup>+</sup> | 848.76331 | 11.887 | TG 50:2 TG 16:0_16:1_18:1 | 0.0172±0.0122 | 0.0233±0.0165 | 0.0046±0.0005 |
| [M+NH4] <sup>+</sup> | 848.7666  | 10.531 | TG 50:2 TG 16:0_16:0_18:2 | 1.8776±0.2412 | 0.9567±0.0039 | 0.4403±0.0265 |
| [M+NH4] <sup>+</sup> | 850.77557 | 10.809 | TG 50:1 TG 16:0_16:0_18:1 | 1.1397±0.0859 | 1.5677±0.0534 | 0.0872±0.0231 |
| [M+NH4] <sup>+</sup> | 852.79449 | 11.097 | TG 50:0 TG 16:0_16:0_18:0 | 0.1684±0.0552 | 0.3288±0.0329 | 0.0377±0.0001 |
| [M+NH4] <sup>+</sup> | 832.73279 | 10.139 | TG 49:3 TG 13:0_18:1_18:2 | 0.0503±0.0261 | 0.0117±0.0007 | 0.0041±0.0002 |
| [M+NH4] <sup>+</sup> | 838.78546 | 11.545 | TG 49:0 TG 14:0_17:0_18:0 | 0.0014±0.0017 | 0.0011±0.0001 | 0.0001±0.0000 |
| [M+NH4] <sup>+</sup> | 812.67303 | 8.999  | TG 48:6 TG 12:0_18:3_18:3 | 0.0947±0.0346 | 0.0036±0.0003 | 0.1548±0.0041 |
| [M+NH4] <sup>+</sup> | 812.67773 | 9.219  | TG 48:6 TG 12:0_14:0_22:6 | 0.1275±0.0487 | 0.0016±0.0000 | 0.1548±0.0041 |
| [M+NH4] <sup>+</sup> | 814.69165 | 9.298  | TG 48:5 TG 12:0_18:2_18:3 | 0.6623±0.2890 | 0.0190±0.0006 | 0.0239±0.0010 |
| [M+NH4] <sup>+</sup> | 816.70697 | 9.593  | TG 48:4 TG 12:0_18:2_18:2 | 2.5167±0.5138 | 0.0659±0.0003 | 0.0515±0.0012 |
| [M+NH4] <sup>+</sup> | 818.72186 | 9.91   | TG 48:3 TG 12:0_18:1_18:2 | 3.0767±0.3213 | 0.1447±0.0038 | 0.1184±0.0008 |
| [M+NH4] <sup>+</sup> | 820.73389 | 10.04  | TG 48:2 TG 14:0_16:0_18:2 | 0.2689±0.0546 | 0.4083±0.0048 | 0.2397±0.0077 |
| [M+NH4] <sup>+</sup> | 820.73395 | 10.222 | TG 48:2 TG 12:0_18:1_18:1 | 2.1705±0.1865 | 0.4071±0.0048 | 0.2385±0.0077 |
| [M+NH4] <sup>+</sup> | 822.74963 | 10.508 | TG 48:1 TG 14:0_16:0_18:1 | 0.7532±0.2134 | 0.5620±0.0028 | 0.1974±0.0076 |
| [M+NH4] <sup>+</sup> | 824.76025 | 10.785 | TG 48:0 TG 14:0_16:0_18:0 | 0.0923±0.0566 | 0.1405±0.0059 | 0.0099±0.0005 |
| [M+NH4] <sup>+</sup> | 804.70593 | 9.731  | TG 47:3 TG 12:0_17:1_18:2 | 0.0630±0.0213 | 0.0125±0.0008 | 0.0015±0.0008 |
| [M+NH4] <sup>+</sup> | 806.71887 | 10.085 | TG 47:2 TG 12:0_17:0_18:2 | 0.0879±0.0484 | 0.0293±0.0024 | 0.0019±0.0001 |
| [M+NH4] <sup>+</sup> | 808.73608 | 10.395 | TG 47:1 TG 12:0_17:0_18:1 | 0.0554±0.0384 | 0.0585±0.0029 | 0.0043±0.0005 |

|                      |           |        |                           |               |               |               |
|----------------------|-----------|--------|---------------------------|---------------|---------------|---------------|
| [M+NH4] <sup>+</sup> | 784.64471 | 8.763  | TG 46:6 TG 12:0_12:0_22:6 | 0.0903±0.0393 | 0.0012±0.0003 | 0.0850±0.0011 |
| [M+NH4] <sup>+</sup> | 786.66022 | 8.864  | TG 46:5 TG 10:0_18:2_18:3 | 0.3497±0.1259 | 0.0117±0.0062 | 0.0117±0.0001 |
| [M+NH4] <sup>+</sup> | 788.67462 | 9.191  | TG 46:4 TG 10:0_18:2_18:2 | 1.4938±0.1703 | 0.0556±0.0002 | 0.0170±0.0006 |
| [M+NH4] <sup>+</sup> | 790.69177 | 9.551  | TG 46:3 TG 10:0_18:1_18:2 | 2.9371±0.2035 | 0.1913±0.0011 | 0.0594±0.0003 |
| [M+NH4] <sup>+</sup> | 792.70703 | 9.892  | TG 46:2 TG 12:0_16:0_18:2 | 3.2533±0.1729 | 0.4541±0.0108 | 0.2611±0.0068 |
| [M+NH4] <sup>+</sup> | 794.72113 | 10.192 | TG 46:1 TG 12:0_16:0_18:1 | 2.4033±0.2691 | 0.7538±0.0004 | 0.5451±0.0164 |
| [M+NH4] <sup>+</sup> | 796.7312  | 10.497 | TG 46:0 TG 12:0_16:0_18:0 | 0.1865±0.0735 | 0.2898±0.0050 | 0.1552±0.0078 |
| [M+NH4] <sup>+</sup> | 778.6911  | 9.743  | TG 45:2 TG 10:0_17:1_18:1 | 0.1293±0.0637 | 0.0477±0.0002 | 0.0066±0.0001 |
| [M+NH4] <sup>+</sup> | 780.70264 | 10.06  | TG 45:1 TG 12:0_15:0_18:1 | 0.0974±0.0624 | 0.0635±0.0005 | 0.0045±0.0009 |
| [M+NH4] <sup>+</sup> | 782.71472 | 10.115 | TG 45:0 TG 14:0_15:0_16:0 | 0.0081±0.0086 | 0.0663±0.0016 | 0.0040±0.0003 |
| [M+NH4] <sup>+</sup> | 782.71393 | 10.382 | TG 45:0 TG 12:0_16:0_17:0 | 0.0211±0.0154 | 0.0663±0.0016 | 0.0048±0.0002 |
| [M+NH4] <sup>+</sup> | 760.64618 | 8.734  | TG 44:4 TG 8:0_18:2_18:2  | 0.4851±0.1582 | 0.0641±0.0004 | 0.0535±0.0011 |
| [M+NH4] <sup>+</sup> | 762.65692 | 9.156  | TG 44:3 TG 8:0_18:1_18:2  | 1.5185±0.3812 | 0.1583±0.0020 | 0.1478±0.0008 |
| [M+NH4] <sup>+</sup> | 764.66919 | 10.421 | TG 44:2 TG 10:0_16:1_18:1 | 0.0021±0.0021 | 0.0012±0.0002 | 0.0011±0.0001 |
| [M+NH4] <sup>+</sup> | 766.69025 | 9.842  | TG 44:1 TG 12:0_14:0_18:1 | 3.5572±0.4677 | 1.3462±0.0232 | 1.0577±0.0303 |
| [M+NH4] <sup>+</sup> | 768.70453 | 10.176 | TG 44:0 TG 12:0_14:0_18:0 | 0.5232±0.1496 | 0.7213±0.0155 | 0.8007±0.0368 |
| [M+NH4] <sup>+</sup> | 750.66058 | 9.298  | TG 43:2 TG 10:0_15:0_18:2 | 0.0860±0.0350 | 0.0671±0.0003 | 0.0099±0.0003 |
| [M+NH4] <sup>+</sup> | 752.6778  | 9.65   | TG 43:1 TG 10:0_15:0_18:1 | 0.1204±0.0683 | 0.1665±0.0023 | 0.0248±0.0015 |
| [M+NH4] <sup>+</sup> | 754.69073 | 10.028 | TG 43:0 TG 10:0_16:0_17:0 | 0.0446±0.0325 | 0.0898±0.0034 | 0.0141±0.0111 |
| [M+NH4] <sup>+</sup> | 732.60736 | 8.286  | TG 42:4 TG 8:0_16:1_18:3  | 0.2013±0.0854 | 0.1221±0.0040 | 0.0119±0.0006 |
| [M+NH4] <sup>+</sup> | 734.62665 | 8.713  | TG 42:3 TG 12:0_12:0_18:3 | 1.1959±0.6135 | 0.2574±0.0112 | 0.0541±0.0002 |
| [M+NH4] <sup>+</sup> | 736.64526 | 9.095  | TG 42:2 TG 12:0_12:0_18:2 | 3.6024±0.4026 | 0.7414±0.0138 | 0.4607±0.0003 |
| [M+NH4] <sup>+</sup> | 738.64893 | 9.101  | TG 42:1 TG 12:0_12:0_18:1 | 0.3009±0.0242 | 0.0919±0.0003 | 0.0481±0.0021 |
| [M+NH4] <sup>+</sup> | 740.67163 | 9.824  | TG 42:0 TG 12:0_14:0_16:0 | 1.1407±0.3935 | 1.9313±0.0400 | 2.9595±0.0334 |
| [M+NH4] <sup>+</sup> | 740.66766 | 9.438  | TG 42:0 TG 10:0_14:0_18:0 | 0.3432±0.0293 | 0.1846±0.0101 | 0.2140±0.0037 |
| [M+NH4] <sup>+</sup> | 722.62292 | 8.861  | TG 41:2 TG 11:0_12:0_18:2 | 0.0559±0.0136 | 0.0984±0.0040 | 0.0086±0.0004 |

|                      |           |       |                           |               |               |                |
|----------------------|-----------|-------|---------------------------|---------------|---------------|----------------|
| [M+NH4] <sup>+</sup> | 724.6438  | 9.546 | TG 41:1 TG 8:0_16:0_17:1  | 0.0019±0.0010 | 0.0121±0.0016 | 0.0012±0.0005  |
| [M+NH4] <sup>+</sup> | 726.65625 | 9.636 | TG 41:0 TG 10:0_15:0_16:0 | 0.0632±0.0391 | 0.2824±0.0114 | 0.0454±0.0019  |
| [M+NH4] <sup>+</sup> | 700.55322 | 7.047 | TG 40:6 TG 8:0_10:0_22:6  | 0.0030±0.0025 | 0.0016±0.0002 | 0.0028±0.0003  |
| [M+NH4] <sup>+</sup> | 706.59753 | 8.228 | TG 40:3 TG 10:0_12:0_18:3 | 0.7737±0.2376 | 0.8226±0.0349 | 0.0511±0.0003  |
| [M+NH4] <sup>+</sup> | 708.61023 | 8.635 | TG 40:2 TG 10:0_12:0_18:2 | 3.2178±0.5013 | 1.8978±0.0634 | 0.3654±0.0026  |
| [M+NH4] <sup>+</sup> | 710.62701 | 9.034 | TG 40:1 TG 10:0_12:0_18:1 | 3.7316±0.3366 | 3.4055±0.1242 | 1.1024±0.0099  |
| [M+NH4] <sup>+</sup> | 712.66296 | 9.195 | TG 40:0 TG 12:0_14:0_14:0 | 0.3219±0.0261 | 0.2414±0.0663 | 6.0173±0.1427  |
| [M+NH4] <sup>+</sup> | 712.64111 | 9.427 | TG 40:0 TG 10:0_14:0_16:0 | 2.1090±0.6847 | 3.5383±0.0542 | 6.0164±0.1427  |
| [M+NH4] <sup>+</sup> | 712.63892 | 9.009 | TG 40:0 TG 10:0_12:0_18:0 | 0.3214±0.0261 | 0.2410±0.0663 | 0.1877±0.0026  |
| [M+NH4] <sup>+</sup> | 694.60071 | 8.142 | TG 39:2 TG 12:0_12:0_15:2 | 0.0154±0.0015 | 0.1620±0.0066 | 0.0045±0.0002  |
| [M+NH4] <sup>+</sup> | 696.60999 | 9.213 | TG 39:1 TG 12:0_13:0_14:1 | 0.0236±0.0400 | 0.0251±0.0000 | 0.0017±0.0002  |
| [M+NH4] <sup>+</sup> | 698.62543 | 9.231 | TG 39:0 TG 10:0_12:0_17:0 | 0.0637±0.0333 | 0.4747±0.0123 | 0.0917±0.0049  |
| [M+NH4] <sup>+</sup> | 680.5777  | 8.134 | TG 38:2 TG 8:0_12:0_18:2  | 0.9377±0.2398 | 2.3388±0.0780 | 0.4785±0.0046  |
| [M+NH4] <sup>+</sup> | 682.59497 | 8.583 | TG 38:1 TG 8:0_12:0_18:1  | 2.0911±0.4275 | 5.5042±0.1393 | 2.1458±0.0716  |
| [M+NH4] <sup>+</sup> | 684.60382 | 8.569 | TG 38:0 TG 8:0_12:0_18:0  | 0.2052±0.0131 | 0.4660±0.0055 | 0.2931±0.0089  |
| [M+NH4] <sup>+</sup> | 684.61243 | 8.98  | TG 38:0 TG 12:0_12:0_14:0 | 3.0385±0.9206 | 6.1169±0.1069 | 8.4432±0.0886  |
| [M+NH4] <sup>+</sup> | 670.59552 | 8.776 | TG 37:0 TG 10:0_12:0_15:0 | 0.0548±0.0247 | 0.9240±0.0159 | 0.1636±0.0056  |
| [M+NH4] <sup>+</sup> | 652.54871 | 7.562 | TG 36:2 TG 8:0_10:0_18:2  | 0.1852±0.0566 | 0.8270±0.0237 | 0.1459±0.0039  |
| [M+NH4] <sup>+</sup> | 654.56427 | 8.082 | TG 36:1 TG 8:0_10:0_18:1  | 0.4849±0.1534 | 3.7052±0.1675 | 0.6192±0.0001  |
| [M+NH4] <sup>+</sup> | 642.56256 | 7.997 | TG 35:0 TG 11:0_11:0_13:0 | 0.0242±0.0043 | 0.0468±0.0021 | 0.0365±0.0001  |
| [M+NH4] <sup>+</sup> | 628.53949 | 7.422 | TG 34:0 TG 8:0_8:0_18:0   | 0.0373±0.0095 | 0.2450±0.0124 | 0.1555±0.0007  |
| [M+NH4] <sup>+</sup> | 628.54773 | 7.958 | TG 34:0 TG 10:0_12:0_12:0 | 1.7741±1.0714 | 8.0057±0.3988 | 10.9354±0.0682 |
| [M+NH4] <sup>+</sup> | 598.50238 | 6.818 | TG 32:1 TG 8:0_10:0_14:1  | 0.0301±0.0058 | 0.7553±0.0104 | 0.0606±0.0018  |
| [M+NH4] <sup>+</sup> | 600.51605 | 7.357 | TG 32:0 TG 10:0_10:0_12:0 | 0.4807±0.2653 | 6.8938±0.2777 | 10.9334±0.0802 |
| [M+NH4] <sup>+</sup> | 570.47144 | 6.148 | TG 30:1 TG 8:0_8:0_14:1   | 0.0040±0.0012 | 0.5920±0.0153 | 0.0461±0.0003  |
| [M+NH4] <sup>+</sup> | 572.48804 | 5.986 | TG 30:0 TG 8:0_8:0_14:0   | 0.0033±0.0024 | 0.2073±0.0130 | 0.1951±0.0041  |

|                      |           |        |                            |               |               |               |
|----------------------|-----------|--------|----------------------------|---------------|---------------|---------------|
| [M+NH4] <sup>+</sup> | 572.48602 | 6.705  | TG 30:0 TG 8:0_10:0_12:0   | 0.0849±0.0518 | 3.2761±0.0852 | 6.8058±0.0992 |
| [M+NH4] <sup>+</sup> | 544.4549  | 5.859  | TG 28:0 TG 8:0_8:0_12:0    | 0.0038±0.0058 | 1.7618±0.0371 | 2.6877±0.0140 |
| [M+NH4] <sup>+</sup> | 544.45544 | 6.586  | TG 28:0 TG 8:0_10:0_10:0   | 0.0000±0.0000 | 0.0031±0.0021 | 0.0041±0.0000 |
| [M+NH4] <sup>+</sup> | 516.42407 | 5.178  | TG 26:0 TG 8:0_8:0_10:0    | 0.0024±0.0010 | 0.6971±0.0272 | 0.3013±0.0050 |
| [M+H] <sup>+</sup>   | 813.68134 | 13.515 | SM 42:2;2O SM 18:1;2O/24:1 | 0.0001±0.0000 | 0.0000±0.0000 | 0.0000±0.0000 |
| [M+H] <sup>+</sup>   | 815.69958 | 7.252  | SM 42:1;2O SM 18:1;2O/24:0 | 0.0001±0.0000 | 0.0000±0.0000 | 0.0000±0.0000 |
| [M+H] <sup>+</sup>   | 787.60559 | 9.317  | SM 41:8;2O SM 20:3;2O/21:5 | 0.0001±0.0000 | 0.0000±0.0000 | 0.0000±0.0000 |
| [M+H] <sup>+</sup>   | 801.68884 | 5.759  | SM 41:1;2O SM 18:1;2O/23:0 | 0.0000±0.0000 | 0.0000±0.0000 | 0.0000±0.0000 |
| [M+H] <sup>+</sup>   | 785.65125 | 7.761  | SM 40:2;2O SM 16:1;2O/24:1 | 0.0000±0.0000 | 0.0000±0.0000 | 0.0000±0.0000 |
| [M+H] <sup>+</sup>   | 761.64697 | 8.838  | SM 38:0;2O SM 16:0;2O/22:0 | 0.0007±0.0001 | 0.0001±0.0000 | 0.0001±0.0000 |
| [M+NH4] <sup>+</sup> | 790.53857 | 9.575  | PG 36:3 PG 18:1_18:2       | 0.0000±0.0000 | 0.0000±0.0000 | 0.0000±0.0000 |
| [M+NH4] <sup>+</sup> | 792.57648 | 9.888  | PG 36:2 PG 18:1_18:1       | 0.0000±0.0000 | 0.0000±0.0000 | 0.0000±0.0000 |
| [M+NH4] <sup>+</sup> | 762.53955 | 9.203  | PG 34:3 PG 14:0_20:3       | 0.0000±0.0000 | 0.0000±0.0000 | 0.0000±0.0000 |
| [M+NH4] <sup>+</sup> | 764.54163 | 4.024  | PG 34:2 PG 16:0_18:2       | 0.0000±0.0000 | 0.0000±0.0000 | 0.0001±0.0000 |
| [M+NH4] <sup>+</sup> | 768.59912 | 10.114 | PG 34:0 PG 16:0_18:0       | 0.0000±0.0000 | 0.0000±0.0000 | 0.0000±0.0000 |
| [M+NH4] <sup>+</sup> | 736.49664 | 9.055  | PG 32:2 PG 14:0_18:2       | 0.0000±0.0000 | 0.0000±0.0000 | 0.0000±0.0000 |
| [M+NH4] <sup>+</sup> | 740.53711 | 9.806  | PG 32:0 PG 16:0_16:0       | 0.0000±0.0000 | 0.0000±0.0000 | 0.0000±0.0000 |
| [M+NH4] <sup>+</sup> | 726.53418 | 9.564  | PG 31:0 PG 15:0_16:0       | 0.0000±0.0000 | 0.0000±0.0000 | 0.0000±0.0000 |
| [M+NH4] <sup>+</sup> | 706.46613 | 8.258  | PG 30:3 PG 12:0_18:3       | 0.0000±0.0000 | 0.0000±0.0000 | 0.0000±0.0000 |
| [M+NH4] <sup>+</sup> | 712.51904 | 9.42   | PG 30:0 PG 14:0_16:0       | 0.0000±0.0000 | 0.0000±0.0000 | 0.0000±0.0000 |
| [M+NH4] <sup>+</sup> | 682.43896 | 8.555  | PG 28:1 PG 12:0_16:1       | 0.0000±0.0000 | 0.0000±0.0000 | 0.0000±0.0000 |
| [M+NH4] <sup>+</sup> | 684.49878 | 8.961  | PG 28:0 PG 14:0_14:0       | 0.0001±0.0000 | 0.0001±0.0000 | 0.0001±0.0000 |
| [M+NH4] <sup>+</sup> | 628.44183 | 7.932  | PG 24:0 PG 12:0_12:0       | 0.0000±0.0000 | 0.0001±0.0000 | 0.0001±0.0000 |
| [M+NH4] <sup>+</sup> | 572.36768 | 6.658  | PG 20:0 PG 8:0_12:0        | 0.0000±0.0000 | 0.0000±0.0000 | 0.0000±0.0000 |
| [M+NH4] <sup>+</sup> | 544.31366 | 5.871  | PG 18:0 PG 6:0_12:0        | 0.0000±0.0000 | 0.0000±0.0000 | 0.0000±0.0000 |
| [M+H] <sup>+</sup>   | 772.52325 | 5.754  | PE P-40:8 PE P-18:2_22:6   | 0.0000±0.0000 | 0.0000±0.0000 | 0.0000±0.0000 |



|                    |           |       |                          |               |               |               |
|--------------------|-----------|-------|--------------------------|---------------|---------------|---------------|
| [M+H] <sup>+</sup> | 774.53937 | 6.382 | PE P-40:7 PE P-18:1_22:6 | 0.0000±0.0000 | 0.0000±0.0000 | 0.0000±0.0000 |
| [M+H] <sup>+</sup> | 776.55804 | 6.636 | PE P-40:6 PE P-18:1_22:5 | 0.0000±0.0000 | 0.0000±0.0000 | 0.0000±0.0000 |
| [M+H] <sup>+</sup> | 776.55695 | 7.065 | PE P-40:6 PE P-18:0_22:6 | 0.0001±0.0000 | 0.0000±0.0000 | 0.0000±0.0000 |
| [M+H] <sup>+</sup> | 778.58167 | 7.155 | PE P-40:5 PE P-18:1_22:4 | 0.0000±0.0000 | 0.0000±0.0000 | 0.0000±0.0000 |
| [M+H] <sup>+</sup> | 778.57574 | 7.309 | PE P-40:5 PE P-18:0_22:5 | 0.0001±0.0000 | 0.0000±0.0000 | 0.0000±0.0000 |
| [M+H] <sup>+</sup> | 780.58197 | 7.818 | PE P-40:4 PE P-18:0_22:4 | 0.0001±0.0001 | 0.0000±0.0000 | 0.0000±0.0000 |
| [M+H] <sup>+</sup> | 748.52667 | 5.974 | PE P-38:6 PE P-18:2_20:4 | 0.0000±0.0000 | 0.0000±0.0000 | 0.0000±0.0000 |
| [M+H] <sup>+</sup> | 748.5235  | 6.318 | PE P-38:6 PE P-16:0_22:6 | 0.0001±0.0000 | 0.0000±0.0000 | 0.0000±0.0000 |
| [M+H] <sup>+</sup> | 750.54156 | 6.598 | PE P-38:5 PE P-18:1_20:4 | 0.0002±0.0001 | 0.0000±0.0000 | 0.0000±0.0000 |
| [M+H] <sup>+</sup> | 752.55939 | 7.298 | PE P-38:4 PE P-18:0_20:4 | 0.0004±0.0002 | 0.0000±0.0000 | 0.0000±0.0000 |
| [M+H] <sup>+</sup> | 752.5592  | 7.132 | PE P-38:4 PE P-16:0_22:4 | 0.0002±0.0001 | 0.0000±0.0000 | 0.0000±0.0000 |
| [M+H] <sup>+</sup> | 738.5332  | 6.912 | PE P-37:4 PE P-17:0_20:4 | 0.0000±0.0000 | 0.0000±0.0000 | 0.0000±0.0000 |
| [M+H] <sup>+</sup> | 722.52045 | 5.97  | PE P-36:5 PE P-16:0_20:5 | 0.0000±0.0000 | 0.0000±0.0000 | 0.0000±0.0000 |
| [M+H] <sup>+</sup> | 724.52765 | 6.214 | PE P-36:4 PE P-18:2_18:2 | 0.0000±0.0000 | 0.0000±0.0000 | 0.0000±0.0000 |
| [M+H] <sup>+</sup> | 724.52771 | 6.549 | PE P-36:4 PE P-16:0_20:4 | 0.0004±0.0001 | 0.0000±0.0000 | 0.0000±0.0000 |
| [M+H] <sup>+</sup> | 726.54315 | 6.825 | PE P-36:3 PE P-18:1_18:2 | 0.0002±0.0001 | 0.0000±0.0000 | 0.0000±0.0000 |
| [M+H] <sup>+</sup> | 728.55591 | 7.508 | PE P-36:2 PE P-18:0_18:2 | 0.0003±0.0001 | 0.0000±0.0000 | 0.0000±0.0000 |
| [M+H] <sup>+</sup> | 730.57214 | 8.08  | PE P-36:1 PE P-16:0_20:1 | 0.0002±0.0001 | 0.0003±0.0001 | 0.0000±0.0000 |
| [M+H] <sup>+</sup> | 700.52667 | 6.727 | PE P-34:2 PE P-16:0_18:2 | 0.0003±0.0001 | 0.0000±0.0000 | 0.0001±0.0000 |
| [M+H] <sup>+</sup> | 702.54218 | 7.32  | PE P-34:1 PE P-16:0_18:1 | 0.0003±0.0001 | 0.0002±0.0000 | 0.0001±0.0001 |
| [M+H] <sup>+</sup> | 792.54944 | 6.676 | PE 40:6 PE 16:1_24:5     | 0.0001±0.0001 | 0.0000±0.0000 | 0.0000±0.0000 |
| [M+H] <sup>+</sup> | 798.60339 | 7.768 | PE 40:3 PE 22:1_18:2     | 0.0000±0.0000 | 0.0000±0.0000 | 0.0000±0.0000 |
| [M+H] <sup>+</sup> | 740.51813 | 6.146 | PE 36:4 PE 16:0_20:4     | 0.0000±0.0000 | 0.0000±0.0000 | 0.0000±0.0000 |
| [M+H] <sup>+</sup> | 744.55042 | 7.133 | PE 36:2 PE 18:0_18:2     | 0.0019±0.0012 | 0.0009±0.0012 | 0.0002±0.0001 |
| [M+H] <sup>+</sup> | 716.43225 | 6.305 | PE 35:9 PE 17:4_18:5     | 0.0000±0.0000 | 0.0000±0.0000 | 0.0000±0.0000 |
| [M+H] <sup>+</sup> | 718.43781 | 6.961 | PE 35:8 PE 17:3_18:5     | 0.0000±0.0000 | 0.0000±0.0000 | 0.0000±0.0000 |

|                                   |           |        |                      |               |               |               |
|-----------------------------------|-----------|--------|----------------------|---------------|---------------|---------------|
| [M+H] <sup>+</sup>                | 692.5163  | 6.818  | PE 32:0 PE 16:0_16:0 | 0.0000±0.0000 | 0.0001±0.0000 | 0.0001±0.0000 |
| [M+H] <sup>+</sup>                | 412.18964 | 1.103  | PE 12:0 PE 6:0_6:0   | 0.0000±0.0000 | 0.0000±0.0000 | 0.0000±0.0000 |
| [M+H] <sup>+</sup>                | 810.60486 | 8.713  | PC 38:4 PC 18:0_20:4 | 0.0001±0.0000 | 0.0000±0.0000 | 0.0000±0.0000 |
| [M+H] <sup>+</sup>                | 818.66315 | 7.856  | PC 38:0 PC 19:0_19:0 | 0.0005±0.0003 | 0.0000±0.0000 | 0.0000±0.0000 |
| [M+H] <sup>+</sup>                | 796.60223 | 5.43   | PC 37:4 PC 17:0_20:4 | 0.0025±0.0017 | 0.0022±0.0030 | 0.0013±0.0006 |
| [M+H] <sup>+</sup>                | 780.55017 | 6.06   | PC 36:5 PC 18:2_18:3 | 0.0000±0.0000 | 0.0002±0.0001 | 0.0006±0.0001 |
| [M+H] <sup>+</sup>                | 782.54309 | 6.875  | PC 36:4 PC 18:2_18:2 | 0.0002±0.0001 | 0.0010±0.0003 | 0.0065±0.0011 |
| [M+H] <sup>+</sup>                | 784.5791  | 8.346  | PC 36:3 PC 18:1_18:2 | 0.0002±0.0002 | 0.0002±0.0000 | 0.0004±0.0001 |
| [M+H] <sup>+</sup>                | 786.60065 | 9.482  | PC 36:2 PC 18:0_18:2 | 0.0068±0.0028 | 0.0011±0.0010 | 0.0008±0.0002 |
| [M+H] <sup>+</sup>                | 788.60925 | 10.74  | PC 36:1 PC 18:0_18:1 | 0.0001±0.0001 | 0.0000±0.0000 | 0.0000±0.0000 |
| [M+H] <sup>+</sup>                | 790.64154 | 5.428  | PC 36:0 PC 17:0_19:0 | 0.0000±0.0000 | 0.0000±0.0000 | 0.0000±0.0000 |
| [M+H] <sup>+</sup>                | 774.60144 | 10.121 | PC 35:1 PC 16:0_19:1 | 0.0000±0.0000 | 0.0000±0.0000 | 0.0000±0.0000 |
| [M+H] <sup>+</sup>                | 758.56891 | 7.937  | PC 34:2 PC 16:0_18:2 | 0.0018±0.0009 | 0.0023±0.0006 | 0.0033±0.0006 |
| [M+H] <sup>+</sup>                | 760.59137 | 9.069  | PC 34:1 PC 16:0_18:1 | 0.0020±0.0012 | 0.0035±0.0019 | 0.0029±0.0006 |
| [M+H] <sup>+</sup>                | 762.59625 | 11.634 | PC 34:0 PC 16:0_18:0 | 0.0002±0.0002 | 0.0000±0.0000 | 0.0000±0.0000 |
| [M+H] <sup>+</sup>                | 706.53949 | 7.77   | PC 30:0 PC 14:0_16:0 | 0.0003±0.0001 | 0.0024±0.0017 | 0.0014±0.0001 |
| [M+NH <sub>4</sub> ] <sup>+</sup> | 642.56097 | 8.744  | MG 38:7              | 0.0002±0.0002 | 0.1100±0.1527 | 0.0015±0.0001 |
| [M+NH <sub>4</sub> ] <sup>+</sup> | 610.48718 | 7.203  | MG 36:9              | 0.0002±0.0002 | 0.0010±0.0003 | 0.0008±0.0001 |
| [M+NH <sub>4</sub> ] <sup>+</sup> | 616.53668 | 7.691  | MG 36:6              | 0.0006±0.0004 | 0.0331±0.0032 | 0.0123±0.0021 |
| [M+NH <sub>4</sub> ] <sup>+</sup> | 612.59259 | 7.746  | MG 35:1              | 0.0626±0.0225 | 0.0136±0.0005 | 0.0042±0.0005 |
| [M+NH <sub>4</sub> ] <sup>+</sup> | 528.40234 | 5.752  | MG 30:8              | 0.0002±0.0000 | 0.0000±0.0000 | 0.0001±0.0000 |
| [M+NH <sub>4</sub> ] <sup>+</sup> | 530.4057  | 6.435  | MG 30:7              | 0.0002±0.0002 | 0.0003±0.0002 | 0.0002±0.0003 |
| [M+NH <sub>4</sub> ] <sup>+</sup> | 528.51276 | 5.742  | MG 29:1              | 0.0152±0.0010 | 0.0000±0.0000 | 0.0000±0.0000 |
| [M+NH <sub>4</sub> ] <sup>+</sup> | 398.3233  | 2.057  | MG 20:3              | 0.0016±0.0005 | 0.0000±0.0000 | 0.0001±0.0000 |
| [M+NH <sub>4</sub> ] <sup>+</sup> | 370.29529 | 1.466  | MG 18:3              | 0.0027±0.0003 | 0.0039±0.0011 | 0.0025±0.0004 |
| [M+NH <sub>4</sub> ] <sup>+</sup> | 372.30896 | 1.824  | MG 18:2              | 0.0256±0.0189 | 0.0187±0.0031 | 0.0174±0.0021 |

|                      |           |       |                                      |               |               |               |
|----------------------|-----------|-------|--------------------------------------|---------------|---------------|---------------|
| [M+NH4] <sup>+</sup> | 376.34229 | 3.038 | MG 18:0                              | 0.3002±0.0173 | 0.5114±0.0453 | 0.4946±0.0347 |
| [M+NH4] <sup>+</sup> | 348.31125 | 2.227 | MG 16:0                              | 0.1501±0.0738 | 0.3519±0.0333 | 0.3133±0.0503 |
| [M+H] <sup>+</sup>   | 574.40778 | 2.4   | LPC 22:3                             | 0.0000±0.0000 | 0.0000±0.0000 | 0.0000±0.0000 |
| [M+H] <sup>+</sup>   | 564.39685 | 2.428 | LPC 21:1                             | 0.0001±0.0001 | 0.0005±0.0001 | 0.0003±0.0001 |
| [M+H] <sup>+</sup>   | 798.67279 | 8.064 | HexCer 41:1;2O HexCer 18:1;2O/23:0   | 0.0000±0.0000 | 0.0000±0.0000 | 0.0000±0.0000 |
| [M+H] <sup>+</sup>   | 728.60516 | 6.601 | HexCer 36:1;2O HexCer 18:1;2O/18:0   | 0.0000±0.0000 | 0.0000±0.0000 | 0.0000±0.0000 |
| [M+H] <sup>+</sup>   | 700.57275 | 5.81  | HexCer 34:1;2O HexCer 18:1;2O/16:0   | 0.0000±0.0000 | 0.0000±0.0000 | 0.0000±0.0000 |
| [M+H] <sup>+</sup>   | 974.74701 | 8.051 | Hex2Cer 42:1;2O Hex2Cer 18:1;2O/24:0 | 0.0000±0.0000 | 0.0000±0.0000 | 0.0000±0.0000 |
| [M+H] <sup>+</sup>   | 960.72235 | 7.715 | Hex2Cer 41:1;2O Hex2Cer 18:1;2O/23:0 | 0.0000±0.0000 | 0.0000±0.0000 | 0.0000±0.0000 |
| [M+H] <sup>+</sup>   | 946.71777 | 7.496 | Hex2Cer 40:1;2O Hex2Cer 18:1;2O/22:0 | 0.0000±0.0000 | 0.0000±0.0000 | 0.0000±0.0000 |
| [M+H] <sup>+</sup>   | 932.70166 | 7.16  | Hex2Cer 39:1;2O Hex2Cer 16:1;2O/23:0 | 0.0000±0.0000 | 0.0000±0.0000 | 0.0000±0.0000 |
| [M+H] <sup>+</sup>   | 918.69092 | 6.889 | Hex2Cer 38:1;2O Hex2Cer 16:1;2O/22:0 | 0.0000±0.0000 | 0.0000±0.0000 | 0.0000±0.0000 |
| [M+H] <sup>+</sup>   | 862.61743 | 5.534 | Hex2Cer 34:1;2O Hex2Cer 18:1;2O/16:0 | 0.0000±0.0000 | 0.0000±0.0000 | 0.0000±0.0000 |
| [M+NH4] <sup>+</sup> | 682.54059 | 6.327 | DG 40:8 DG 18:2_22:6                 | 0.0434±0.0082 | 0.0141±0.0010 | 0.0142±0.0000 |
| [M+NH4] <sup>+</sup> | 684.55548 | 6.952 | DG 40:7 DG 18:1_22:6                 | 0.0542±0.0047 | 0.0002±0.0000 | 0.0056±0.0010 |
| [M+NH4] <sup>+</sup> | 694.63141 | 8.854 | DG 40:2 DG 18:1_22:1                 | 0.0063±0.0026 | 0.0106±0.0002 | 0.0031±0.0002 |
| [M+NH4] <sup>+</sup> | 678.5871  | 8.172 | DG 39:3 DG 21:1_18:2                 | 0.0004±0.0003 | 0.0001±0.0001 | 0.0001±0.0000 |
| [M+NH4] <sup>+</sup> | 656.52423 | 6.115 | DG 38:7 DG 18:3_20:4                 | 0.0034±0.0009 | 0.0029±0.0001 | 0.0075±0.0004 |
| [M+NH4] <sup>+</sup> | 658.54193 | 6.682 | DG 38:6 DG 18:2_20:4                 | 0.0339±0.0126 | 0.0056±0.0001 | 0.0124±0.0005 |
| [M+NH4] <sup>+</sup> | 658.54077 | 7.032 | DG 38:6 DG 16:0_22:6                 | 0.0262±0.0020 | 0.0011±0.0010 | 0.0007±0.0002 |
| [M+NH4] <sup>+</sup> | 660.55878 | 7.171 | DG 38:5 DG 18:1_20:4                 | 0.0584±0.0141 | 0.0138±0.0001 | 0.0076±0.0006 |
| [M+NH4] <sup>+</sup> | 664.5899  | 7.853 | DG 38:3 DG 20:1_18:2                 | 0.0370±0.0119 | 0.0177±0.0005 | 0.0034±0.0004 |
| [M+NH4] <sup>+</sup> | 666.60126 | 8.321 | DG 38:2 DG 18:1_20:1                 | 0.0238±0.0088 | 0.0464±0.0002 | 0.0110±0.0012 |
| [M+NH4] <sup>+</sup> | 630.50775 | 5.832 | DG 36:6 DG 18:3_18:3                 | 0.0114±0.0062 | 0.0641±0.0026 | 0.0148±0.0007 |
| [M+NH4] <sup>+</sup> | 632.52557 | 6.321 | DG 36:5 DG 18:2_18:3                 | 0.0957±0.0249 | 0.1515±0.0077 | 0.1876±0.0070 |
| [M+NH4] <sup>+</sup> | 634.54138 | 6.766 | DG 36:4 DG 18:2_18:2                 | 0.4760±0.2385 | 1.4039±0.0060 | 0.8381±0.0459 |

|                      |           |       |                      |               |               |               |
|----------------------|-----------|-------|----------------------|---------------|---------------|---------------|
| [M+NH4] <sup>+</sup> | 636.55615 | 7.351 | DG 36:3 DG 18:1_18:2 | 1.1061±0.6645 | 2.1658±0.0138 | 0.3947±0.0301 |
| [M+NH4] <sup>+</sup> | 638.56055 | 7.293 | DG 36:2 DG 18:1_18:1 | 0.1063±0.0490 | 0.1301±0.0059 | 0.0305±0.0007 |
| [M+NH4] <sup>+</sup> | 640.58606 | 8.304 | DG 36:1 DG 18:0_18:1 | 0.0855±0.0205 | 0.3805±0.0066 | 0.0777±0.0041 |
| [M+NH4] <sup>+</sup> | 642.60217 | 8.789 | DG 36:0 DG 18:0_18:0 | 0.1895±0.0474 | 0.0581±0.0013 | 0.0607±0.0006 |
| [M+NH4] <sup>+</sup> | 622.53656 | 7.017 | DG 35:3 DG 17:1_18:2 | 0.0119±0.0037 | 0.0061±0.0008 | 0.0032±0.0005 |
| [M+NH4] <sup>+</sup> | 624.55444 | 7.519 | DG 35:2 DG 17:0_18:2 | 0.0246±0.0121 | 0.0170±0.0011 | 0.0056±0.0005 |
| [M+NH4] <sup>+</sup> | 602.47821 | 5.408 | DG 34:6 DG 12:0_22:6 | 0.0249±0.0066 | 0.0084±0.0001 | 0.0132±0.0001 |
| [M+NH4] <sup>+</sup> | 608.52344 | 6.716 | DG 34:3 DG 16:1_18:2 | 0.2643±0.0406 | 0.2669±0.0020 | 0.0463±0.0024 |
| [M+NH4] <sup>+</sup> | 612.54718 | 7.272 | DG 34:1 DG 18:0_16:1 | 0.1023±0.0410 | 0.0671±0.0043 | 0.0106±0.0135 |
| [M+NH4] <sup>+</sup> | 612.55365 | 7.739 | DG 34:1 DG 16:0_18:1 | 1.4245±0.4540 | 3.2931±0.0993 | 0.2811±0.0232 |
| [M+NH4] <sup>+</sup> | 614.56042 | 7.724 | DG 34:0 DG 16:0_18:0 | 0.0929±0.0274 | 0.1080±0.0041 | 0.0038±0.0011 |
| [M+NH4] <sup>+</sup> | 600.55341 | 8.04  | DG 33:0 DG 16:0_17:0 | 0.0081±0.0050 | 0.0163±0.0005 | 0.0035±0.0010 |
| [M+NH4] <sup>+</sup> | 580.49194 | 6.05  | DG 32:3 DG 14:0_18:3 | 0.0486±0.0235 | 0.0099±0.0005 | 0.0021±0.0008 |
| [M+NH4] <sup>+</sup> | 582.50751 | 6.554 | DG 32:2 DG 14:0_18:2 | 0.2980±0.0642 | 0.0495±0.0019 | 0.0299±0.0023 |
| [M+NH4] <sup>+</sup> | 584.52417 | 7.116 | DG 32:1 DG 14:0_18:1 | 0.4431±0.0569 | 0.2283±0.0152 | 0.0922±0.0053 |
| [M+NH4] <sup>+</sup> | 568.49255 | 6.22  | DG 31:2 DG 13:0_18:2 | 0.0126±0.0143 | 0.0003±0.0001 | 0.0002±0.0001 |
| [M+NH4] <sup>+</sup> | 552.46216 | 5.231 | DG 30:3 DG 12:0_18:3 | 0.0463±0.0320 | 0.0021±0.0000 | 0.0010±0.0001 |
| [M+NH4] <sup>+</sup> | 554.47632 | 5.805 | DG 30:2 DG 12:0_18:2 | 0.4310±0.1060 | 0.0146±0.0011 | 0.0360±0.0019 |
| [M+NH4] <sup>+</sup> | 556.49414 | 6.424 | DG 30:1 DG 12:0_18:1 | 0.5002±0.1206 | 0.0787±0.0026 | 0.2128±0.0070 |
| [M+NH4] <sup>+</sup> | 558.50751 | 7.064 | DG 30:0 DG 14:0_16:0 | 0.1063±0.0095 | 0.2619±0.0141 | 0.1841±0.0021 |
| [M+NH4] <sup>+</sup> | 558.49847 | 6.445 | DG 30:0 DG 12:0_18:0 | 0.0495±0.0035 | 0.0063±0.0085 | 0.0375±0.0009 |
| [M+NH4] <sup>+</sup> | 540.46338 | 5.465 | DG 29:2 DG 11:0_18:2 | 0.0022±0.0009 | 0.0004±0.0001 | 0.0002±0.0001 |
| [M+NH4] <sup>+</sup> | 526.44708 | 4.993 | DG 28:2 DG 10:0_18:2 | 0.1324±0.0251 | 0.0052±0.0001 | 0.0047±0.0000 |
| [M+NH4] <sup>+</sup> | 528.46075 | 5.677 | DG 28:1 DG 10:0_18:1 | 0.2950±0.0296 | 0.0266±0.0010 | 0.0283±0.0014 |
| [M+NH4] <sup>+</sup> | 530.47827 | 6.365 | DG 28:0 DG 12:0_16:0 | 0.2421±0.0199 | 0.1086±0.0074 | 0.3724±0.0116 |
| [M+NH4] <sup>+</sup> | 512.42969 | 4.58  | DG 27:2 DG 9:0_18:2  | 0.0006±0.0001 | 0.0005±0.0003 | 0.0003±0.0000 |

|                      |           |       |                                |               |               |               |
|----------------------|-----------|-------|--------------------------------|---------------|---------------|---------------|
| [M+NH4] <sup>+</sup> | 514.45264 | 5.597 | DG 27:1 DG 12:0_15:1           | 0.0014±0.0005 | 0.0001±0.0000 | 0.0003±0.0001 |
| [M+NH4] <sup>+</sup> | 516.46295 | 6.046 | DG 27:0 DG 12:0_15:0           | 0.0054±0.0023 | 0.0020±0.0026 | 0.0007±0.0006 |
| [M+NH4] <sup>+</sup> | 498.41061 | 4.717 | DG 26:2 DG 8:0_18:2            | 0.0004±0.0003 | 0.0002±0.0001 | 0.0004±0.0002 |
| [M+NH4] <sup>+</sup> | 500.4332  | 5.203 | DG 26:1 DG 10:0_16:1           | 0.0238±0.0311 | 0.0076±0.0106 | 0.0010±0.0001 |
| [M+NH4] <sup>+</sup> | 502.44559 | 5.578 | DG 26:0 DG 12:0_14:0           | 0.2684±0.0420 | 0.0847±0.0027 | 0.6001±0.0027 |
| [M+NH4] <sup>+</sup> | 488.43015 | 5.174 | DG 25:0 DG 10:0_15:0           | 0.0028±0.0014 | 0.0022±0.0003 | 0.0010±0.0009 |
| [M+NH4] <sup>+</sup> | 474.41327 | 4.711 | DG 24:0 DG 12:0_12:0           | 0.1353±0.0462 | 0.0745±0.0036 | 0.6186±0.0194 |
| [M+H] <sup>+</sup>   | 700.57904 | 6.77  | CerP 40:2;2O CerP 18:0;2O/22:2 | 0.0000±0.0000 | 0.0000±0.0000 | 0.0000±0.0000 |
| [M+H] <sup>+</sup>   | 512.50043 | 7.37  | Cer(d18:0/14:0)                | 0.0027±0.0011 | 0.0035±0.0004 | 0.0019±0.0001 |

---

**Table S3 The content of lipid in negative ion mode**

| Adduct ion name | Average Mz | Average Rt(min) | Metabolite name            | HM            | IF1           | IF2           |
|-----------------|------------|-----------------|----------------------------|---------------|---------------|---------------|
| [M+AcO-H]-      | 871.68781  | 3.401           | SM 42:2;2O SM 25:1;2O/17:1 | 0.4848±0.1003 | 0.0016±0.0016 | 0.0003±0.0004 |
| [M+AcO-H]-      | 871.68134  | 12.982          | SM 42:2;2O SM 18:1;2O/24:1 | 1.0270±0.9140 | 0.0011±0.0007 | 0.0000±0.0000 |
| [M+AcO-H]-      | 845.59735  | 9.387           | SM 41:8;2O SM 21:3;2O/20:5 | 1.1377±0.6065 | 0.0206±0.0026 | 0.0259±0.0042 |
| [M+AcO-H]-      | 843.65887  | 11.012          | SM 40:2;2O SM 22:0;2O/18:2 | 0.2279±0.0534 | 0.0199±0.0023 | 0.0143±0.0034 |
| [M+AcO-H]-      | 845.67133  | 3.383           | SM 40:1;2O SM 25:1;2O/15:0 | 0.3300±0.0654 | 0.0000±0.0000 | 0.0096±0.0010 |
| [M+AcO-H]-      | 845.67084  | 14.735          | SM 40:1;2O SM 18:1;2O/22:0 | 0.8831±0.4904 | 0.0133±0.0015 | 0.0004±0.0001 |
| [M+AcO-H]-      | 817.63861  | 10.788          | SM 38:1;2O SM 18:1;2O/20:0 | 1.4921±0.4334 | 0.0006±0.0009 | 0.0106±0.0057 |
| [M+AcO-H]-      | 787.59314  | 7.813           | SM 36:2;2O SM 16:1;2O/20:1 | 0.1940±0.1356 | 0.0164±0.0006 | 0.0046±0.0033 |
| [M+AcO-H]-      | 789.60913  | 9.075           | SM 36:1;2O SM 18:1;2O/18:0 | 5.7032±1.7099 | 0.1465±0.0086 | 0.0144±0.0023 |
| [M+AcO-H]-      | 791.62769  | 9.541           | SM 36:0;2O SM 18:0;2O/18:0 | 0.3824±0.0912 | 0.0299±0.0101 | 0.0050±0.0036 |
| [M+AcO-H]-      | 761.57788  | 7.569           | SM 34:1;2O SM 18:1;2O/16:0 | 1.5717±0.1599 | 0.4729±0.0676 | 0.3725±0.1830 |
| [M-H]-          | 834.51825  | 4.759           | PS 40:6 PS 18:0_22:6       | 0.1877±0.1103 | 0.0262±0.0191 | 0.0393±0.0344 |
| [M-H]-          | 836.55414  | 5.239           | PS 40:5 PS 18:0_22:5       | 0.0607±0.0440 | 0.0520±0.0501 | 0.0342±0.0278 |
| [M-H]-          | 838.5498   | 5.599           | PS 40:4 PS 18:0_22:4       | 0.0516±0.0434 | 0.0092±0.0005 | 0.0113±0.0015 |
| [M-H]-          | 812.54639  | 5.258           | PS 38:3 PS 18:0_20:3       | 0.1315±0.1325 | 0.5825±0.1098 | 0.3593±0.0818 |
| [M-H]-          | 814.56079  | 5.844           | PS 38:2 PS 18:0_20:2       | 0.0322±0.0268 | 0.0107±0.0043 | 0.0477±0.0197 |
| [M-H]-          | 784.52002  | 4.397           | PS 36:3 PS 18:1_18:2       | 0.0650±0.0642 | 0.0679±0.0246 | 0.2793±0.1104 |
| [M-H]-          | 784.50769  | 4.539           | PS 36:3 PS 18:0_18:3       | 0.0655±0.0636 | 0.0657±0.0276 | 0.2349±0.1731 |
| [M-H]-          | 786.52887  | 5.767           | PS 36:2 PS 18:1_18:1       | 0.1230±0.1066 | 0.0102±0.0027 | 0.0523±0.0087 |
| [M-H]-          | 786.52429  | 5.064           | PS 36:2 PS 18:0_18:2       | 1.5090±1.0926 | 0.1413±0.1780 | 0.9285±0.0864 |
| [M-H]-          | 788.54456  | 5.499           | PS 36:1 PS 18:0_18:1       | 0.5216±0.7344 | 0.3108±0.0852 | 0.9088±0.1236 |
| [M-H]-          | 760.51343  | 4.728           | PS 34:1 PS 16:0_18:1       | 0.0000±0.0000 | 0.0000±0.0000 | 0.2829±0.0658 |

|        |           |       |                      |               |               |                |
|--------|-----------|-------|----------------------|---------------|---------------|----------------|
| [M-H]- | 762.51575 | 5.629 | PS 34:0 PS 16:0_18:0 | 0.0252±0.0120 | 0.0869±0.0452 | 0.1075±0.0205  |
| [M-H]- | 909.5473  | 4.403 | PI 40:6 PI 18:0_22:6 | 0.0480±0.0152 | 0.0014±0.0009 | 0.0023±0.0009  |
| [M-H]- | 911.57123 | 4.9   | PI 40:5 PI 18:0_22:5 | 0.0134±0.0045 | 0.0012±0.0016 | 0.0006±0.0009  |
| [M-H]- | 883.52521 | 3.952 | PI 38:5 PI 18:1_20:4 | 0.3823±0.1008 | 0.3750±0.1708 | 0.0904±0.0341  |
| [M-H]- | 885.54193 | 4.233 | PI 38:4 PI 18:1_20:3 | 0.1471±0.0518 | 0.2054±0.0286 | 0.0570±0.0462  |
| [M-H]- | 885.54657 | 4.608 | PI 38:4 PI 18:0_20:4 | 1.4176±0.3211 | 0.7868±0.0972 | 0.1267±0.1748  |
| [M-H]- | 887.55963 | 4.918 | PI 38:3 PI 18:0_20:3 | 0.8983±0.3649 | 0.7140±0.1201 | 0.1234±0.1456  |
| [M-H]- | 871.52698 | 4.222 | PI 37:4 PI 17:0_20:4 | 0.0081±0.0039 | 0.0141±0.0047 | 0.0004±0.0006  |
| [M-H]- | 855.50775 | 2.776 | PI 36:5 PI 18:2_18:3 | 0.0002±0.0004 | 0.1184±0.0039 | 0.4024±0.0320  |
| [M-H]- | 857.52155 | 3.28  | PI 36:4 PI 18:2_18:2 | 0.0001±0.0002 | 0.6855±0.0836 | 2.4734±0.1620  |
| [M-H]- | 857.51196 | 3.841 | PI 36:4 PI 16:0_20:4 | 0.0529±0.0225 | 0.0793±0.1064 | 0.0175±0.0067  |
| [M-H]- | 859.52386 | 4.014 | PI 36:3 PI 18:1_18:2 | 0.5614±0.1107 | 0.6966±0.5165 | 1.6580±0.0036  |
| [M-H]- | 861.55078 | 4.539 | PI 36:2 PI 18:1_18:1 | 1.8803±0.0963 | 3.6203±0.4107 | 3.3588±0.1161  |
| [M-H]- | 861.54681 | 4.725 | PI 36:2 PI 18:0_18:2 | 1.8803±0.0963 | 3.6203±0.4107 | 3.3588±0.1161  |
| [M-H]- | 863.55865 | 5.287 | PI 36:1 PI 18:0_18:1 | 0.5403±0.0974 | 1.2804±1.6010 | 1.2542±0.0705  |
| [M-H]- | 865.57501 | 5.888 | PI 36:0 PI 18:0_18:0 | 0.0059±0.0044 | 0.0506±0.0138 | 0.0218±0.0129  |
| [M-H]- | 831.50659 | 3.288 | PI 34:3 PI 16:0_18:3 | 0.0062±0.0069 | 0.9444±0.1908 | 1.7367±0.1802  |
| [M-H]- | 833.51483 | 3.97  | PI 34:2 PI 16:0_18:2 | 0.2078±0.0437 | 4.2406±0.5672 | 13.2752±0.4234 |
| [M-H]- | 835.53156 | 4.538 | PI 34:1 PI 16:0_18:1 | 0.4548±0.0971 | 1.4911±0.1839 | 2.7414±0.1609  |
| [M-H]- | 807.50427 | 3.774 | PI 32:1 PI 14:0_18:1 | 0.0381±0.0140 | 0.2406±0.0447 | 1.0084±0.0303  |
| [M-H]- | 781.48712 | 3.729 | PI 30:0 PI 12:0_18:0 | 0.0151±0.0113 | 0.1121±0.0218 | 0.0038±0.0020  |
| [M-H]- | 795.54407 | 9.067 | PG 38:5 PG 18:1_20:4 | 0.0196±0.0046 | 0.0337±0.0203 | 0.0099±0.0037  |
| [M-H]- | 777.56451 | 6.086 | PG 36:0 PG 17:0_19:0 | 0.2292±0.0878 | 0.2612±0.0484 | 0.0080±0.0056  |
| [M-H]- | 763.53772 | 5.766 | PG 35:0 PG 17:0_18:0 | 0.1382±0.0227 | 0.1069±0.0121 | 0.0418±0.0087  |
| [M-H]- | 735.51538 | 5.056 | PG 33:0 PG 16:0_17:0 | 0.0390±0.0111 | 0.0280±0.0345 | 0.0033±0.0026  |
| [M-H]- | 828.64948 | 9.428 | PE 42:1 PE 24:0_18:1 | 0.0227±0.0068 | 0.0528±0.0129 | 0.0569±0.0012  |

|        |           |       |                      |                |               |               |
|--------|-----------|-------|----------------------|----------------|---------------|---------------|
| [M-H]- | 790.53558 | 6.685 | PE 40:6 PE 18:0_22:6 | 0.8833±0.2594  | 0.0331±0.0227 | 0.0257±0.0176 |
| [M-H]- | 792.54974 | 7.202 | PE 40:5 PE 18:0_22:5 | 0.5398±0.2734  | 0.0011±0.0015 | 0.0000±0.0000 |
| [M-H]- | 794.56445 | 7.424 | PE 40:4 PE 18:0_22:4 | 0.5178±0.3071  | 0.0546±0.0508 | 0.0263±0.0247 |
| [M-H]- | 798.59479 | 8.331 | PE 40:2 PE 18:1_22:1 | 0.3972±0.3322  | 0.1476±0.0138 | 0.2230±0.0021 |
| [M-H]- | 800.62225 | 7.18  | PE 40:1 PE 22:0_18:1 | 0.0218±0.0027  | 0.1770±0.0205 | 0.1119±0.0256 |
| [M-H]- | 800.61578 | 8.942 | PE 40:1 PE 18:0_22:1 | 0.5457±0.3216  | 0.1231±0.0126 | 0.0951±0.0209 |
| [M-H]- | 764.51862 | 6.217 | PE 38:5 PE 18:1_20:4 | 0.3424±0.0587  | 0.1837±0.1627 | 0.1344±0.0314 |
| [M-H]- | 766.53076 | 6.495 | PE 38:4 PE 18:2_20:2 | 0.1492±0.0441  | 0.3749±0.2646 | 0.2050±0.0514 |
| [M-H]- | 766.54175 | 6.574 | PE 38:4 PE 18:1_20:3 | 0.1492±0.0441  | 0.3274±0.3317 | 0.2566±0.0216 |
| [M-H]- | 766.53247 | 6.905 | PE 38:4 PE 18:0_20:4 | 1.8568±0.2241  | 0.2885±0.3874 | 0.2808±0.0122 |
| [M-H]- | 768.55249 | 7.268 | PE 38:3 PE 18:0_20:3 | 1.7124±0.4769  | 0.2837±0.0282 | 0.2392±0.0023 |
| [M-H]- | 770.56415 | 9.128 | PE 38:2 PE 18:1_20:1 | 0.2610±0.1212  | 0.0482±0.0375 | 0.0193±0.0107 |
| [M-H]- | 770.57074 | 7.779 | PE 38:2 PE 18:0_20:2 | 1.2929±0.6368  | 0.1290±0.1065 | 0.2780±0.0096 |
| [M-H]- | 772.58032 | 8.331 | PE 38:1 PE 18:0_20:1 | 2.3977±1.1989  | 0.1883±0.0088 | 0.0703±0.0546 |
| [M-H]- | 774.58911 | 8.316 | PE 38:0 PE 18:0_20:0 | 0.2556±0.1151  | 0.0373±0.0118 | 0.0170±0.0073 |
| [M-H]- | 736.48962 | 4.974 | PE 36:5 PE 18:2_18:3 | 0.0096±0.0088  | 0.0560±0.0031 | 1.0639±0.0862 |
| [M-H]- | 738.50293 | 5.77  | PE 36:4 PE 18:2_18:2 | 0.3648±0.1712  | 0.1800±0.1575 | 9.9488±1.0807 |
| [M-H]- | 740.52386 | 6.245 | PE 36:3 PE 18:1_18:2 | 3.0417±0.8821  | 1.8229±0.1208 | 8.5095±0.9396 |
| [M-H]- | 742.53058 | 6.408 | PE 36:2 PE 18:1_18:1 | 0.2514±0.0641  | 0.1337±0.1229 | 0.7970±0.1462 |
| [M-H]- | 742.53131 | 7.137 | PE 36:2 PE 18:0_18:2 | 16.1819±4.0786 | 3.6903±4.0228 | 5.1503±5.7086 |
| [M-H]- | 744.54767 | 7.709 | PE 36:1 PE 18:0_18:1 | 5.7035±1.9239  | 3.2290±0.1271 | 3.0735±0.2357 |
| [M-H]- | 746.56238 | 6.314 | PE 36:0 PE 18:0_18:0 | 0.0204±0.0047  | 0.0087±0.0085 | 0.0048±0.0011 |
| [M-H]- | 746.57208 | 8.342 | PE 36:0 PE 17:0_19:0 | 0.2578±0.0672  | 0.0411±0.0018 | 0.0649±0.0418 |
| [M-H]- | 722.4563  | 6.555 | PE 35:5 PE 15:1_20:4 | 0.2560±0.0607  | 0.0255±0.0036 | 0.0098±0.0032 |
| [M-H]- | 728.5127  | 6.741 | PE 35:2 PE 17:0_18:2 | 0.0928±0.0175  | 0.2269±0.0516 | 0.2474±0.2794 |
| [M-H]- | 730.53033 | 7.322 | PE 35:1 PE 17:0_18:1 | 0.1782±0.0558  | 0.4270±0.0384 | 0.4731±0.0597 |



|            |           |       |                                    |               |               |                |
|------------|-----------|-------|------------------------------------|---------------|---------------|----------------|
| [M-H]-     | 712.48828 | 5.763 | PE 34:3 PE 16:0_18:3               | 0.0454±0.0216 | 0.1049±0.1140 | 1.4048±0.0682  |
| [M-H]-     | 714.50153 | 6.366 | PE 34:2 PE 16:0_18:2               | 0.8993±0.2538 | 1.4178±0.0602 | 12.1632±1.4442 |
| [M-H]-     | 716.5257  | 6.773 | PE 34:1 PE 16:0_18:1               | 0.7370±1.2749 | 3.0312±0.0767 | 5.2807±0.4092  |
| [M-H]-     | 660.4743  | 5.436 | PE 30:1 PE 16:0_14:1               | 0.0300±0.0043 | 0.5822±0.0605 | 0.4242±0.0730  |
| [M-H]-     | 731.56201 | 8.001 | PA 38:0 PA 19:0_19:0               | 0.1869±0.0454 | 0.0446±0.0039 | 0.0075±0.0040  |
| [M-H]-     | 693.44867 | 3.582 | PA 36:5 PA 18:2_18:3               | 0.0001±0.0002 | 0.0122±0.0008 | 0.6666±0.0887  |
| [M-H]-     | 697.47882 | 4.812 | PA 36:3 PA 18:1_18:2               | 0.0003±0.0003 | 0.0404±0.0398 | 1.9487±0.0591  |
| [M-H]-     | 699.50189 | 5.461 | PA 36:2 PA 18:1_18:1               | 0.0000±0.0000 | 0.0646±0.0660 | 0.4047±0.0197  |
| [M-H]-     | 669.44885 | 4.139 | PA 34:3 PA 16:0_18:3               | 0.0006±0.0005 | 0.0056±0.0041 | 0.2890±0.0322  |
| [M-H]-     | 671.48962 | 5.609 | PA 34:2 PA 16:0_18:2               | 0.0244±0.0366 | 2.4854±0.3502 | 0.2981±0.1676  |
| [M-H]-     | 673.47852 | 5.467 | PA 34:1 PA 16:0_18:1               | 0.0004±0.0007 | 0.0011±0.0015 | 0.6130±0.0016  |
| [M-H]-     | 506.32236 | 2.255 | LPE 20:1                           | 0.3183±0.0992 | 0.0558±0.0055 | 0.0046±0.0025  |
| [M-H]-     | 476.27463 | 1.349 | LPE 18:2                           | 1.1027±0.5833 | 4.2974±0.1677 | 0.7759±0.2499  |
| [M-H]-     | 478.29214 | 1.697 | LPE 18:1                           | 1.6241±0.7821 | 7.2775±0.2920 | 0.5112±0.1649  |
| [M-H]-     | 480.30713 | 2.306 | LPE 18:0                           | 7.6184±4.9658 | 3.4616±0.0149 | 0.1168±0.0360  |
| [M-H]-     | 452.27655 | 1.647 | LPE 16:0                           | 0.8641±0.3632 | 6.4395±0.1764 | 0.4165±0.1525  |
| [M+AcO-H]- | 576.32971 | 1.464 | LPC 18:3                           | 0.0021±0.0015 | 0.9415±0.0524 | 0.0939±0.0242  |
| [M+AcO-H]- | 578.34662 | 1.749 | LPC 18:2                           | 0.3275±0.2573 | 8.0553±0.2602 | 1.7110±0.5060  |
| [M+AcO-H]- | 580.3559  | 2.238 | LPC 18:1                           | 0.0000±0.0000 | 3.8745±0.0374 | 0.7336±0.2349  |
| [M+AcO-H]- | 582.37347 | 3.029 | LPC 18:0                           | 1.3283±0.5557 | 2.5795±0.0570 | 0.1657±0.0044  |
| [M+AcO-H]- | 554.34692 | 2.187 | LPC 16:0                           | 0.1129±0.0467 | 8.1923±0.1886 | 0.9307±0.2398  |
| [M+AcO-H]- | 526.31287 | 1.563 | LPC 14:0                           | 0.1314±0.1593 | 0.3319±0.0285 | 0.0000±0.0000  |
| [M-H]-     | 808.66168 | 7.827 | HexCer 42:2;2O HexCer 18:1;2O/24:1 | 0.6739±0.1718 | 0.0056±0.0004 | 0.0033±0.0022  |
| [M-H]-     | 810.68158 | 8.372 | HexCer 42:1;2O HexCer 18:1;2O/24:0 | 0.9142±0.4121 | 0.0445±0.0023 | 0.0138±0.0002  |
| [M+AcO-H]- | 842.66949 | 7.858 | HexCer 40:1;2O HexCer 21:1;2O/19:0 | 0.2998±0.0893 | 0.4751±0.0697 | 0.2036±0.0747  |
| [M+AcO-H]- | 842.68085 | 7.769 | HexCer 40:1;2O HexCer 18:1;2O/22:0 | 0.2998±0.0893 | 0.4751±0.0697 | 0.2036±0.0747  |

|            |           |       |                                    |               |               |               |
|------------|-----------|-------|------------------------------------|---------------|---------------|---------------|
| [M-H]-     | 754.62671 | 7.278 | HexCer 38:1;2O HexCer 20:0;2O/18:1 | 0.1174±0.0200 | 0.0063±0.0008 | 0.0109±0.0028 |
| [M-H]-     | 726.58801 | 6.654 | HexCer 36:1;2O HexCer 18:0;2O/18:1 | 0.0645±0.0135 | 0.0146±0.0017 | 0.0021±0.0011 |
| [M-H]-     | 690.67242 | 8.537 | Cer 45:1;2O Cer 23:1;2O/22:0       | 0.0131±0.0041 | 0.0006±0.0008 | 0.0002±0.0000 |
| [M+AcO-H]- | 732.65466 | 8.546 | Cer 44:3;2O Cer 20:2;2O/24:1       | 0.0490±0.0254 | 0.0006±0.0009 | 0.0002±0.0002 |
| [M+AcO-H]- | 720.65027 | 8.706 | Cer 43:2;2O Cer 19:1;2O/24:1       | 0.1682±0.1073 | 0.0490±0.0016 | 0.0235±0.0065 |
| [M+AcO-H]- | 722.66241 | 9.199 | Cer 43:1;2O Cer 18:1;2O/25:0       | 0.1093±0.0561 | 0.1090±0.0170 | 0.0500±0.0132 |
| [M-H]-     | 634.5     | 8.58  | Cer 42:8;2O Cer 20:2;2O/22:6       | 0.0333±0.0084 | 0.0011±0.0015 | 0.0002±0.0003 |
| [M+AcO-H]- | 706.63287 | 8.489 | Cer 42:2;2O Cer 18:1;2O/24:1       | 7.7252±3.2451 | 0.2334±0.0035 | 0.0439±0.0130 |
| [M+AcO-H]- | 708.65076 | 8.865 | Cer 42:1;2O Cer 18:1;2O/24:0       | 1.6624±1.3712 | 0.8080±0.0281 | 0.2179±0.0478 |
| [M+AcO-H]- | 710.66797 | 9.167 | Cer 42:0;2O Cer 18:0;2O/24:0       | 0.1485±0.1047 | 0.0782±0.0103 | 0.0429±0.0112 |
| [M+AcO-H]- | 692.61523 | 8.248 | Cer 41:2;2O Cer 17:1;2O/24:1       | 0.1368±0.0526 | 0.1436±0.1130 | 0.0379±0.0217 |
| [M+AcO-H]- | 694.63141 | 8.746 | Cer 41:1;2O Cer 18:1;2O/23:0       | 0.6277±0.2423 | 1.1061±0.0254 | 0.5096±0.1625 |
| [M+AcO-H]- | 696.66815 | 8.832 | Cer 41:0;2O Cer 18:0;2O/23:0       | 0.0978±0.0380 | 0.1967±0.0051 | 0.0540±0.0042 |
| [M+AcO-H]- | 666.53619 | 7.723 | Cer 40:8;2O Cer 18:2;2O/22:6       | 0.2376±0.0529 | 0.8712±0.0514 | 0.3365±0.1122 |
| [M+AcO-H]- | 678.59503 | 8.01  | Cer 40:2;2O Cer 18:2;2O/22:0       | 0.9085±0.3581 | 0.2044±0.0026 | 0.0173±0.0058 |
| [M-H]-     | 618.57782 | 8.007 | Cer 40:2;2O Cer 16:1;2O/24:1       | 0.2056±0.0451 | 0.0005±0.0007 | 0.0001±0.0002 |
| [M+AcO-H]- | 680.62311 | 8.379 | Cer 40:1;2O Cer 18:1;2O/22:0       | 2.2338±0.4882 | 1.3354±0.0377 | 0.2600±0.1012 |
| [M+AcO-H]- | 682.63312 | 8.665 | Cer 40:0;2O Cer 16:0;2O/24:0       | 0.2303±0.0738 | 0.3795±0.0271 | 0.2011±0.0566 |
| [M+AcO-H]- | 666.60474 | 8.255 | Cer 39:1;2O Cer 17:1;2O/22:0       | 0.1041±0.0527 | 0.9416±0.0814 | 0.3270±0.1218 |
| [M+AcO-H]- | 666.60712 | 8.143 | Cer 39:1;2O Cer 16:1;2O/23:0       | 0.1041±0.0527 | 0.9416±0.0814 | 0.3270±0.1218 |
| [M+AcO-H]- | 668.61786 | 8.332 | Cer 39:0;2O Cer 16:0;2O/23:0       | 0.0444±0.0166 | 0.5676±0.0435 | 0.1320±0.0441 |
| [M+AcO-H]- | 652.58527 | 7.971 | Cer 38:1;2O Cer 18:1;2O/20:0       | 0.8649±0.2921 | 0.6219±0.0144 | 0.1180±0.0349 |
| [M+AcO-H]- | 652.58398 | 7.844 | Cer 38:1;2O Cer 16:1;2O/22:0       | 0.8649±0.2921 | 0.6341±0.0150 | 0.1243±0.0371 |
| [M+AcO-H]- | 654.58215 | 8.242 | Cer 38:0;2O Cer 16:0;2O/22:0       | 0.1556±0.0358 | 0.6094±0.0215 | 0.2047±0.0586 |
| [M+AcO-H]- | 622.52875 | 6.757 | Cer 36:2;2O Cer 18:2;2O/18:0       | 0.2230±0.1654 | 0.0342±0.0194 | 0.0076±0.0091 |
| [M+AcO-H]- | 624.5575  | 7.257 | Cer 36:1;2O Cer 18:1;2O/18:0       | 0.9276±0.4648 | 0.1532±0.0207 | 0.0468±0.0094 |

|            |           |       |                              |               |               |               |
|------------|-----------|-------|------------------------------|---------------|---------------|---------------|
| [M+AcO-H]- | 626.59491 | 7.577 | Cer 36:0;2O Cer 18:0;2O/18:0 | 0.1448±0.0467 | 0.3052±0.0074 | 0.2403±0.0551 |
| [M+AcO-H]- | 596.52551 | 6.523 | Cer 34:1;2O Cer 18:1;2O/16:0 | 0.6786±0.5866 | 0.8799±0.0773 | 0.2484±0.0649 |
| [M+AcO-H]- | 582.51099 | 6.126 | Cer 33:1;2O Cer 17:1;2O/16:0 | 0.0364±0.0164 | 0.0818±0.0093 | 0.0207±0.0075 |
| [M+AcO-H]- | 568.49304 | 5.89  | Cer 32:1;2O Cer 18:1;2O/14:0 | 0.2625±0.0967 | 0.0960±0.0052 | 0.0401±0.0106 |
| [M+AcO-H]- | 568.49841 | 5.754 | Cer 32:1;2O Cer 16:1;2O/16:0 | 0.2625±0.0967 | 0.0960±0.0052 | 0.0401±0.0106 |
| [M+AcO-H]- | 570.50647 | 6.021 | Cer 32:0;2O Cer 16:0;2O/16:0 | 0.0256±0.0154 | 0.1151±0.0058 | 0.0286±0.0073 |
| [M+AcO-H]- | 512.4256  | 4.157 | Cer 28:1;2O Cer 18:1;2O/10:0 | 0.0778±0.0731 | 0.0008±0.0002 | 0.0008±0.0002 |
| [M+AcO-H]- | 514.45166 | 4.485 | Cer 28:0;2O Cer 18:0;2O/10:0 | 0.0174±0.0180 | 0.0010±0.0001 | 0.0004±0.0004 |

---

**Table S4.** Special lipid species detected in HM and absent from IF1

| Adduct ion name      | Average Mz | Average Rt(min) | Metabolite name            |
|----------------------|------------|-----------------|----------------------------|
| [M+NH4] <sup>+</sup> | 922.78314  | 10.36           | TG 56:7 TG 16:0_18:1_22:6  |
| [M+NH4] <sup>+</sup> | 840.70416  | 9.629           | TG 50:6 TG 14:0_14:0_22:6  |
| [M+H] <sup>+</sup>   | 813.68134  | 13.515          | SM 42:2;2O SM 18:1;2O/24:1 |
| [M+H] <sup>+</sup>   | 815.69958  | 7.252           | SM 42:1;2O SM 18:1;2O/24:0 |
| [M+H] <sup>+</sup>   | 787.60559  | 9.317           | SM 41:8;2O SM 20:3;2O/21:5 |
| [M+H] <sup>+</sup>   | 776.55695  | 7.065           | PE P-40:6 PE P-18:0_22:6   |
| [M+H] <sup>+</sup>   | 778.57574  | 7.309           | PE P-40:5 PE P-18:0_22:5   |
| [M+H] <sup>+</sup>   | 780.58197  | 7.818           | PE P-40:4 PE P-18:0_22:4   |
| [M+H] <sup>+</sup>   | 748.5235   | 6.318           | PE P-38:6 PE P-16:0_22:6   |
| [M+H] <sup>+</sup>   | 750.54156  | 6.598           | PE P-38:5 PE P-18:1_20:4   |
| [M+H] <sup>+</sup>   | 752.55939  | 7.298           | PE P-38:4 PE P-18:0_20:4   |
| [M+H] <sup>+</sup>   | 752.5592   | 7.132           | PE P-38:4 PE P-16:0_22:4   |
| [M+H] <sup>+</sup>   | 724.52771  | 6.549           | PE P-36:4 PE P-16:0_20:4   |
| [M+H] <sup>+</sup>   | 726.54315  | 6.825           | PE P-36:3 PE P-18:1_18:2   |
| [M+H] <sup>+</sup>   | 728.55591  | 7.508           | PE P-36:2 PE P-18:0_18:2   |
| [M+H] <sup>+</sup>   | 700.52667  | 6.727           | PE P-34:2 PE P-16:0_18:2   |
| [M+H] <sup>+</sup>   | 792.54944  | 6.676           | PE 40:6 PE 16:1_24:5       |
| [M+H] <sup>+</sup>   | 796.60223  | 5.43            | PC 37:4 PC 17:0_20:4       |
| [M+H] <sup>+</sup>   | 810.60486  | 8.713           | PC 38:4 PC 18:0_20:4       |
| [M+H] <sup>+</sup>   | 788.60925  | 10.74           | PC 36:1 PC 18:0_18:1       |
| [M+H] <sup>+</sup>   | 762.59625  | 11.634          | PC 34:0 PC 16:0_18:0       |
| [M+NH4] <sup>+</sup> | 528.51276  | 5.742           | MG 29:1                    |
| [M+NH4] <sup>+</sup> | 398.3233   | 2.057           | MG 20:3                    |

|                                   |           |       |                            |
|-----------------------------------|-----------|-------|----------------------------|
| [M+NH <sub>4</sub> ] <sup>+</sup> | 528.40234 | 5.752 | MG 30:8                    |
| [M+AcO-H] <sup>-</sup>            | 845.67133 | 3.383 | SM 40:1;2O SM 25:1;2O/15:0 |

---

**Table S5.** Special lipid species detected in HM and absent from IF2

| Adduct ion name                   | Average Mz | Average Rt(min) | Metabolite name            |
|-----------------------------------|------------|-----------------|----------------------------|
| [M+H] <sup>+</sup>                | 813.68134  | 13.515          | SM 42:2;2O SM 18:1;2O/24:1 |
| [M+H] <sup>+</sup>                | 815.69958  | 7.252           | SM 42:1;2O SM 18:1;2O/24:0 |
| [M+H] <sup>+</sup>                | 787.60559  | 9.317           | SM 41:8;2O SM 20:3;2O/21:5 |
| [M+H] <sup>+</sup>                | 776.55695  | 7.065           | PE P-40:6 PE P-18:0_22:6   |
| [M+H] <sup>+</sup>                | 778.57574  | 7.309           | PE P-40:5 PE P-18:0_22:5   |
| [M+H] <sup>+</sup>                | 780.58197  | 7.818           | PE P-40:4 PE P-18:0_22:4   |
| [M+H] <sup>+</sup>                | 748.5235   | 6.318           | PE P-38:6 PE P-16:0_22:6   |
| [M+H] <sup>+</sup>                | 750.54156  | 6.598           | PE P-38:5 PE P-18:1_20:4   |
| [M+H] <sup>+</sup>                | 752.55939  | 7.298           | PE P-38:4 PE P-18:0_20:4   |
| [M+H] <sup>+</sup>                | 752.5592   | 7.132           | PE P-38:4 PE P-16:0_22:4   |
| [M+H] <sup>+</sup>                | 724.52771  | 6.549           | PE P-36:4 PE P-16:0_20:4   |
| [M+H] <sup>+</sup>                | 726.54315  | 6.825           | PE P-36:3 PE P-18:1_18:2   |
| [M+H] <sup>+</sup>                | 728.55591  | 7.508           | PE P-36:2 PE P-18:0_18:2   |
| [M+H] <sup>+</sup>                | 730.57214  | 8.08            | PE P-36:1 PE P-16:0_20:1   |
| [M+H] <sup>+</sup>                | 792.54944  | 6.676           | PE 40:6 PE 16:1_24:5       |
| [M+H] <sup>+</sup>                | 796.60223  | 5.43            | PC 37:4 PC 17:0_20:4       |
| [M+H] <sup>+</sup>                | 810.60486  | 8.713           | PC 38:4 PC 18:0_20:4       |
| [M+H] <sup>+</sup>                | 788.60925  | 10.74           | PC 36:1 PC 18:0_18:1       |
| [M+H] <sup>+</sup>                | 762.59625  | 11.634          | PC 34:0 PC 16:0_18:0       |
| [M+NH <sub>4</sub> ] <sup>+</sup> | 528.51276  | 5.742           | MG 29:1                    |
| [M+AcO-H] <sup>-</sup>            | 871.68134  | 12.982          | SM 42:2;2O SM 18:1;2O/24:1 |
| [M-H] <sup>-</sup>                | 792.54974  | 7.202           | PE 40:5 PE 18:0_22:5       |

[M+AcO-H]-

526.31287

1.563

LPC 14:0

---

**Table S6.** Metabolic pathways of differential lipids

| KEGG pathway |                                                      |
|--------------|------------------------------------------------------|
| map05417     | Lipid and atherosclerosis                            |
| map05415     | Diabetic cardiomyopathy                              |
| map05322     | Systemic lupus erythematosus                         |
| map05231     | Choline metabolism in cancer                         |
| map05212     | Pancreatic cancer                                    |
| map05200     | Pathways in cancer                                   |
| map05167     | Kaposi sarcoma-associated herpesvirus infection      |
| map05152     | Tuberculosis                                         |
| map05146     | Amoebiasis                                           |
| map05140     | Leishmaniasis                                        |
| map05132     | Salmonella infection                                 |
| map05130     | Pathogenic Escherichia coli infection                |
| map04979     | Cholesterol metabolism                               |
| map04977     | Vitamin digestion and absorption                     |
| map04975     | Fat digestion and absorption                         |
| map04933     | AGE-RAGE signaling pathway in diabetic complications |
| map04931     | Insulin resistance                                   |
| map04923     | Regulation of lipolysis in adipocytes                |
| map04920     | Adipocytokine signaling pathway                      |
| map04912     | GnRH signaling pathway                               |
| map04723     | Retrograde endocannabinoid signaling                 |
| map04722     | Neurotrophin signaling pathway                       |
| map04714     | Thermogenesis                                        |
| map04666     | Fc gamma R-mediated phagocytosis                     |



|          |                                                            |
|----------|------------------------------------------------------------|
| map04217 | Necroptosis                                                |
| map04140 | Autophagy - animal                                         |
| map04138 | Autophagy - yeast                                          |
| map04136 | Autophagy - other                                          |
| map04072 | Phospholipase D signaling pathway                          |
| map04071 | Sphingolipid signaling pathway                             |
| map04070 | Phosphatidylinositol signaling system                      |
| map04024 | cAMP signaling pathway                                     |
| map01110 | Biosynthesis of secondary metabolites                      |
| map01100 | Metabolic pathways                                         |
| map00603 | Glycosphingolipid biosynthesis - globo and isoglobo series |
| map00600 | Sphingolipid metabolism                                    |
| map00592 | alpha-Linolenic acid metabolism                            |
| map00591 | Linoleic acid metabolism                                   |
| map00590 | Arachidonic acid metabolism                                |
| map00571 | Lipoarabinomannan (LAM) biosynthesis                       |
| map00564 | Glycerophospholipid metabolism                             |
| map00563 | Glycosylphosphatidylinositol (GPI)-anchor biosynthesis     |
| map00562 | Inositol phosphate metabolism                              |
| map00561 | Glycerolipid metabolism                                    |
| map00260 | Glycine, serine and threonine metabolism                   |

---
